# Supplementary figures and images for: Cannabidiol as a Promising Adjuvant Therapy for Estrogen Receptor-Positive Breast Tumors: Unveiling Its Benefits with Aromatase Inhibitors
Source: MDPI journal article supplement (doi:10.3390/cancers15092517), 2023-04-27

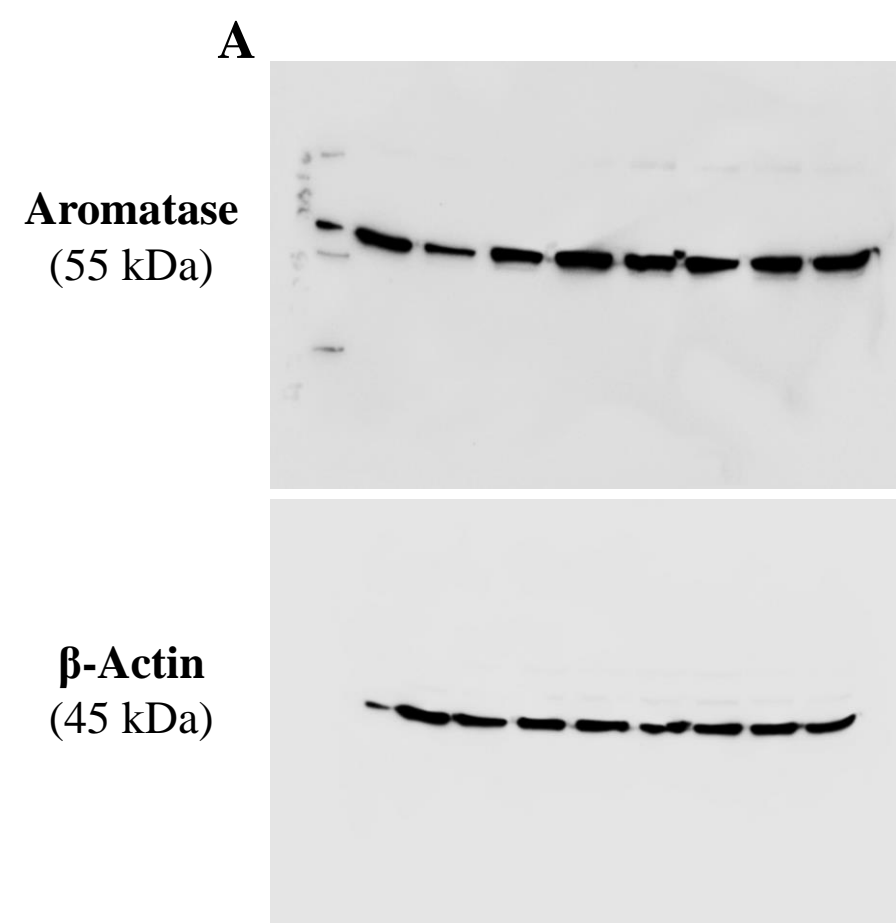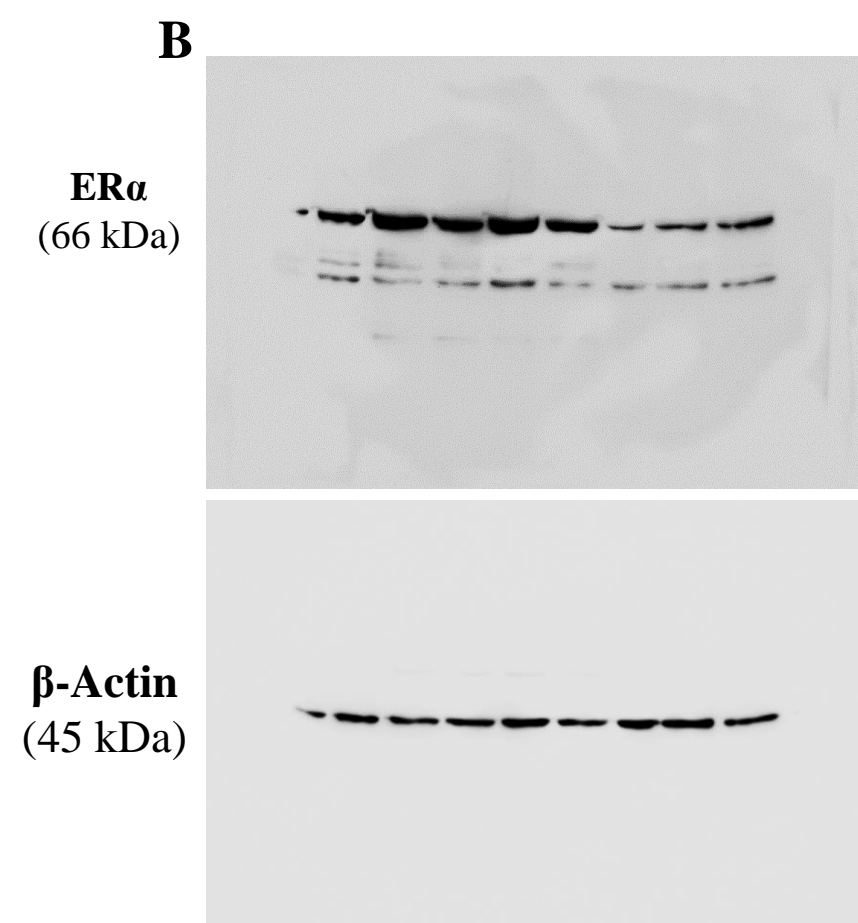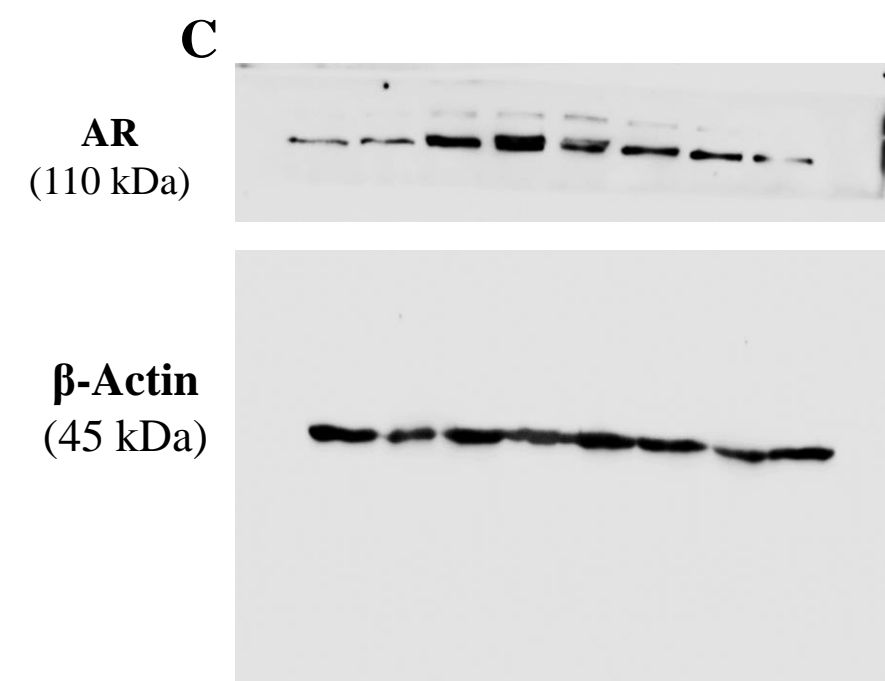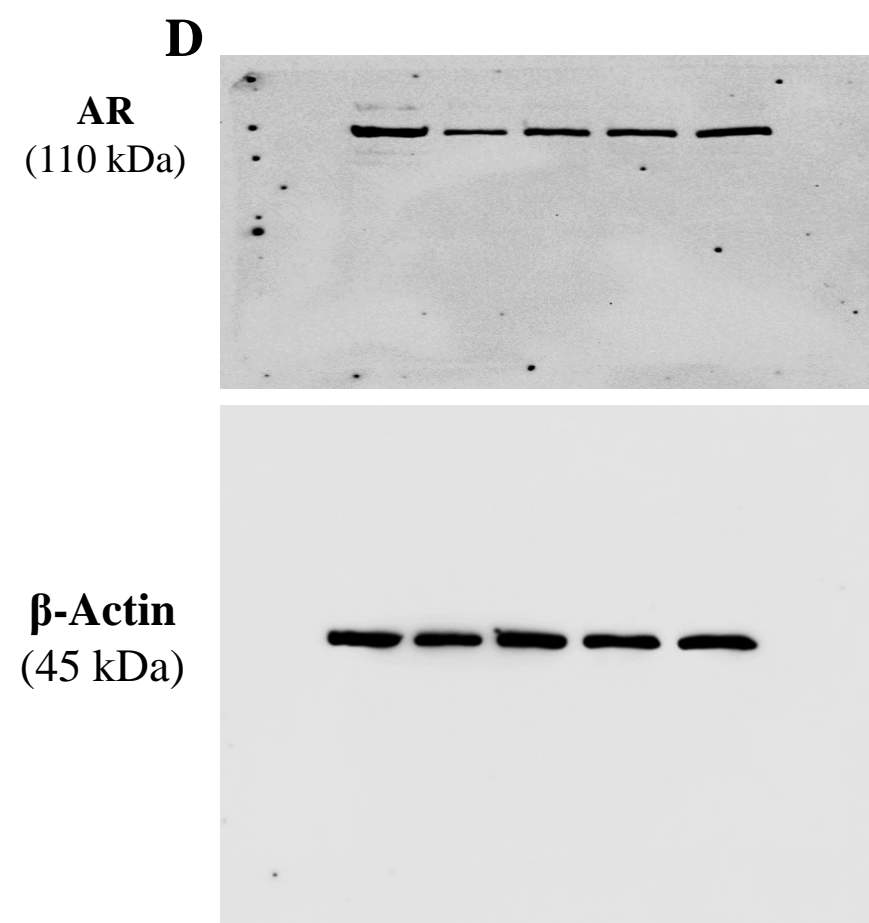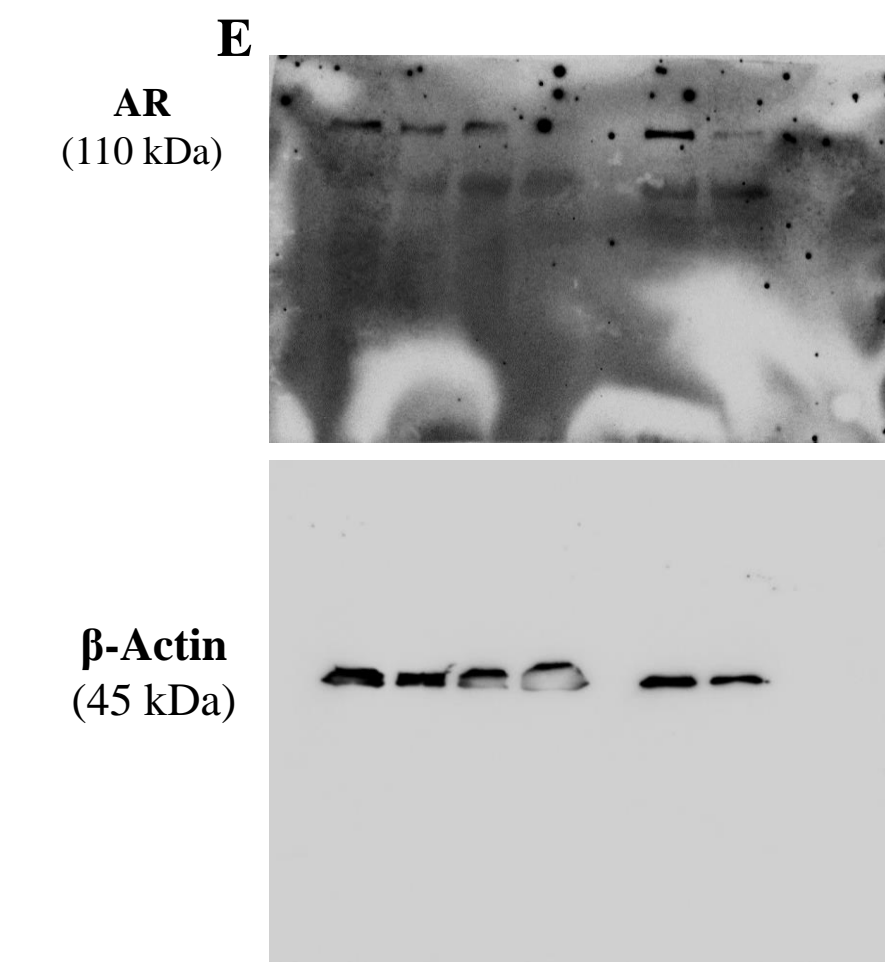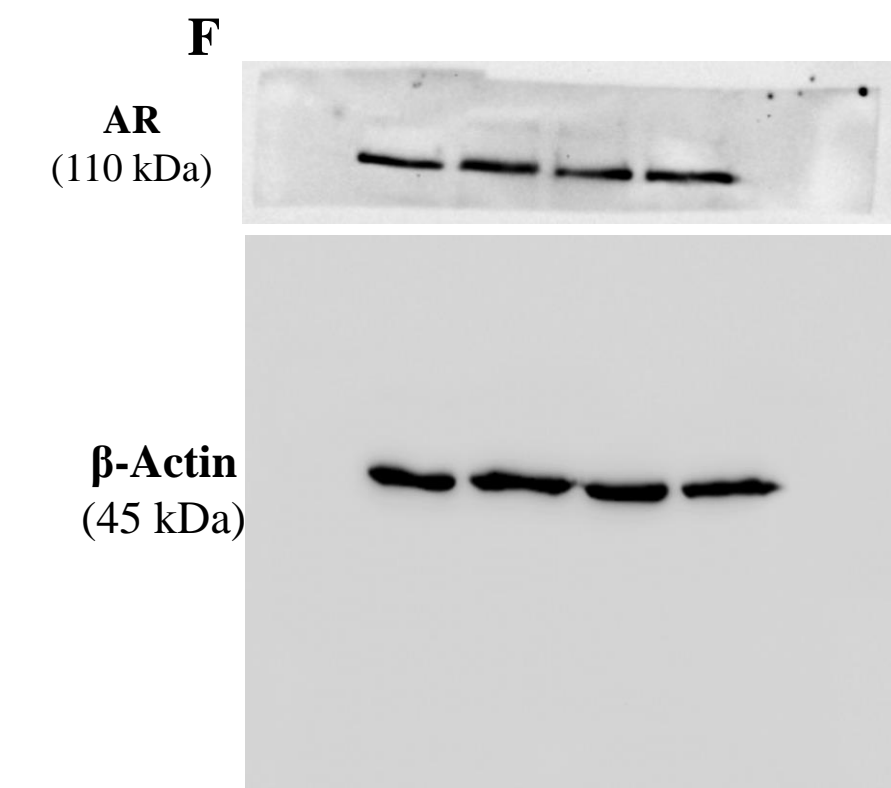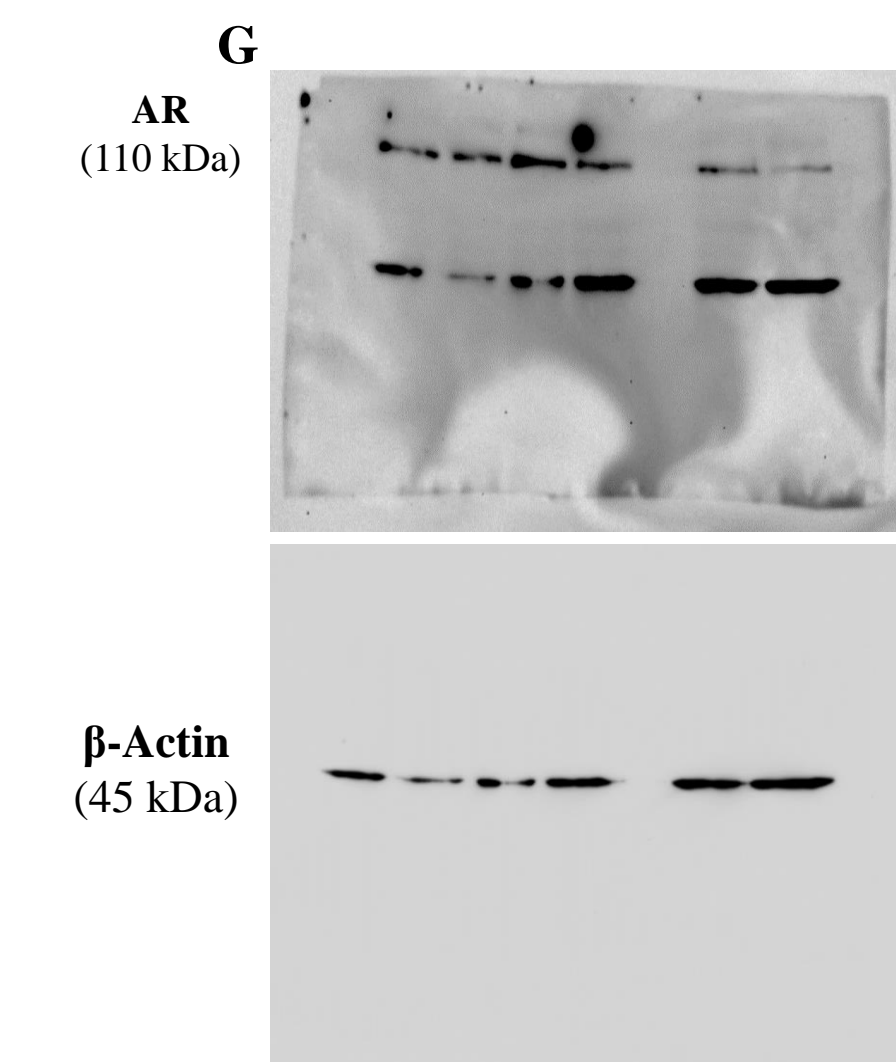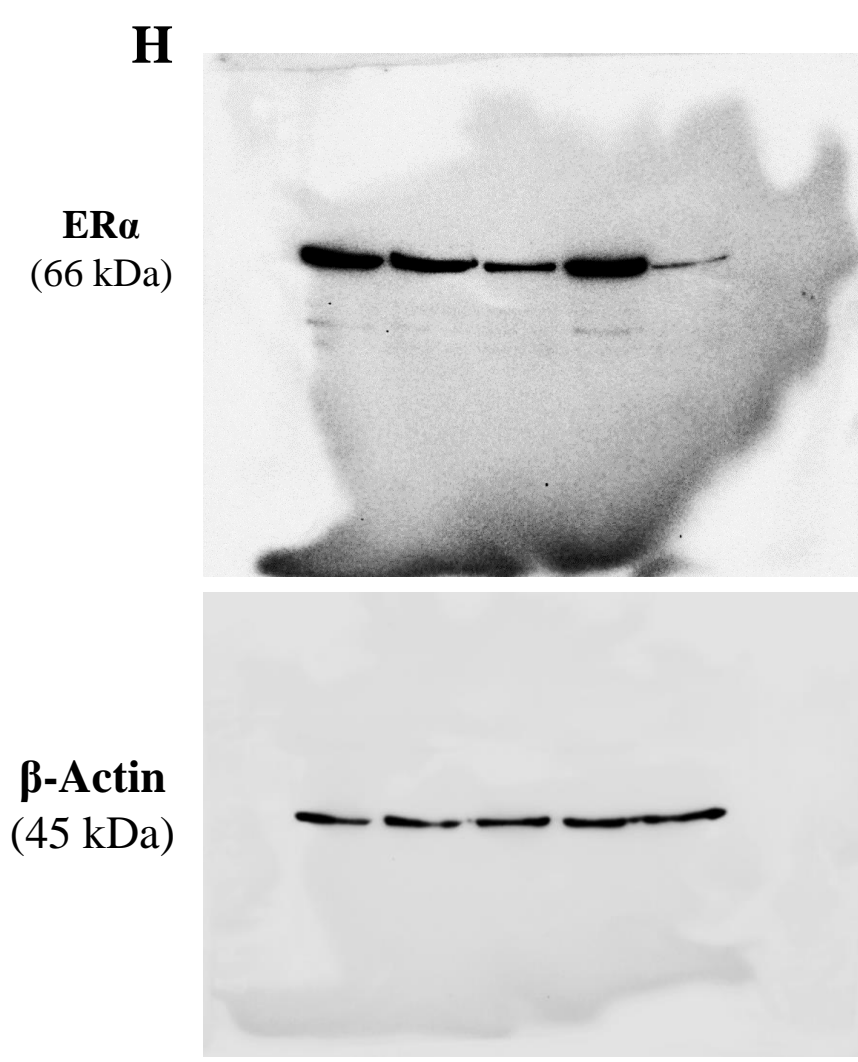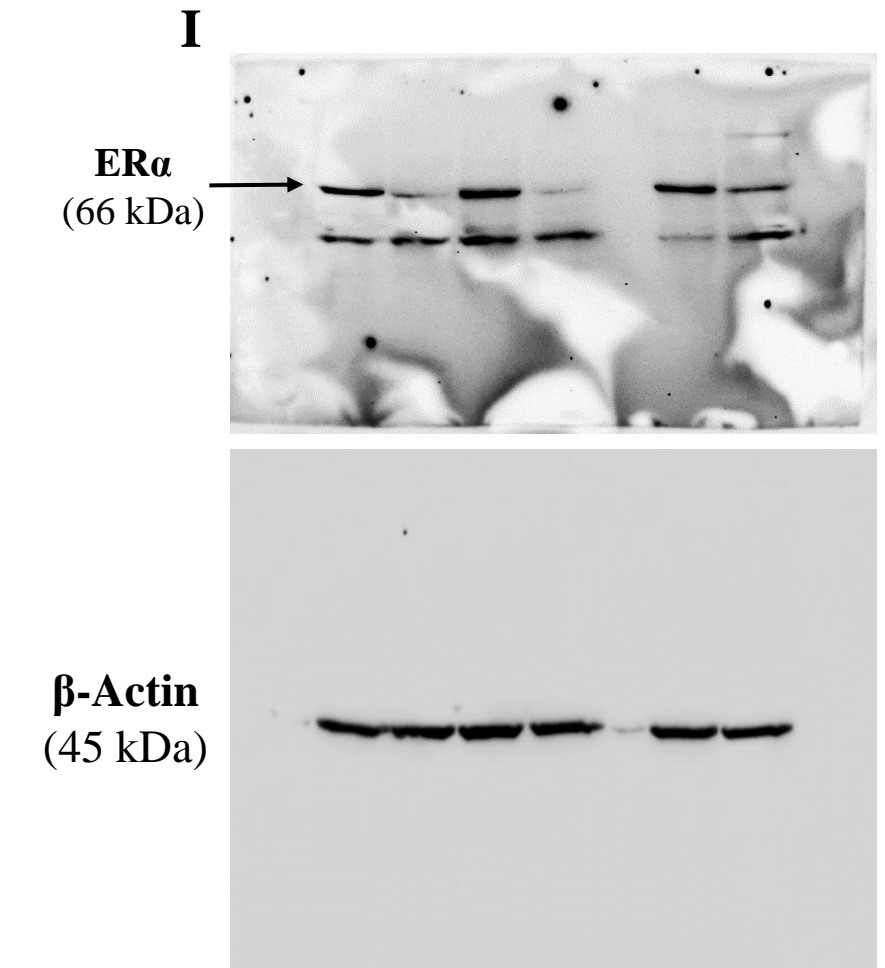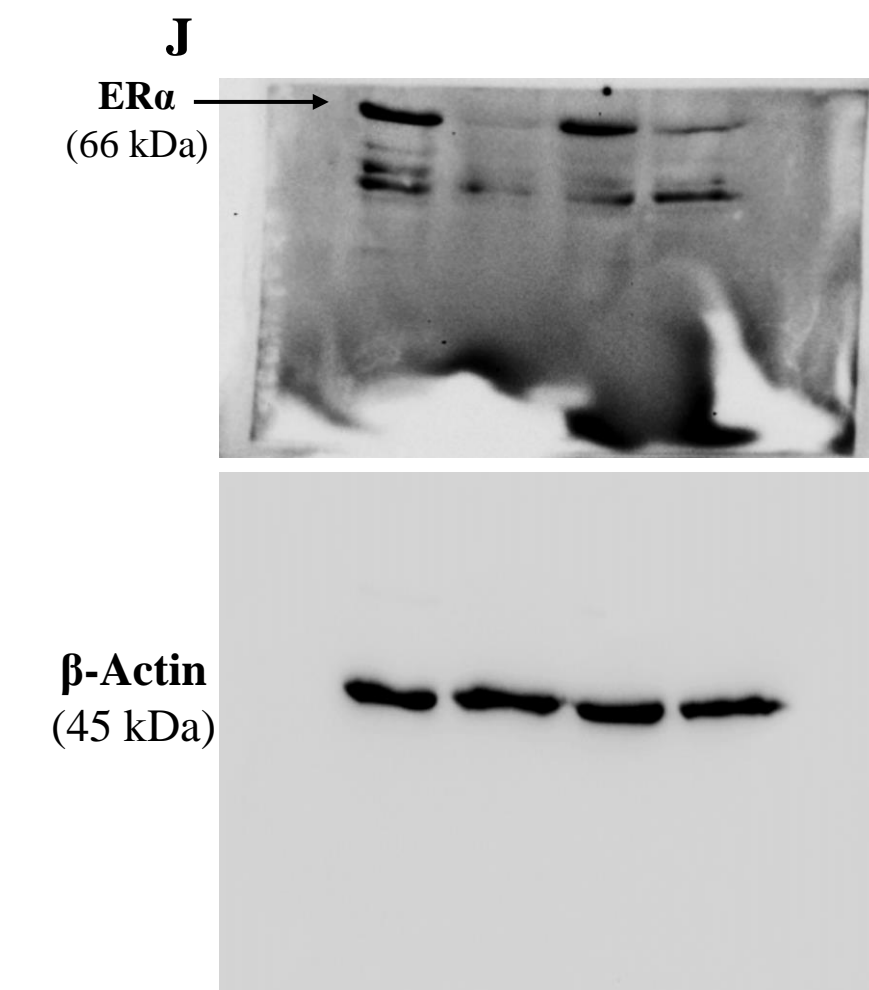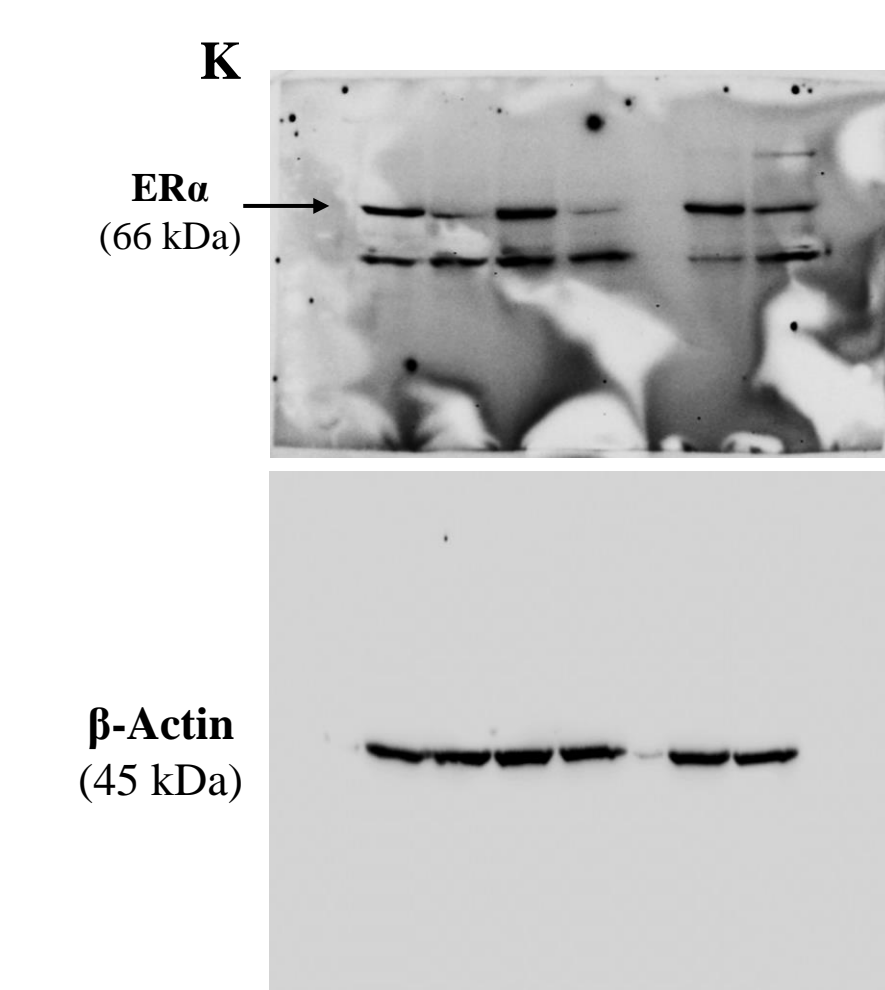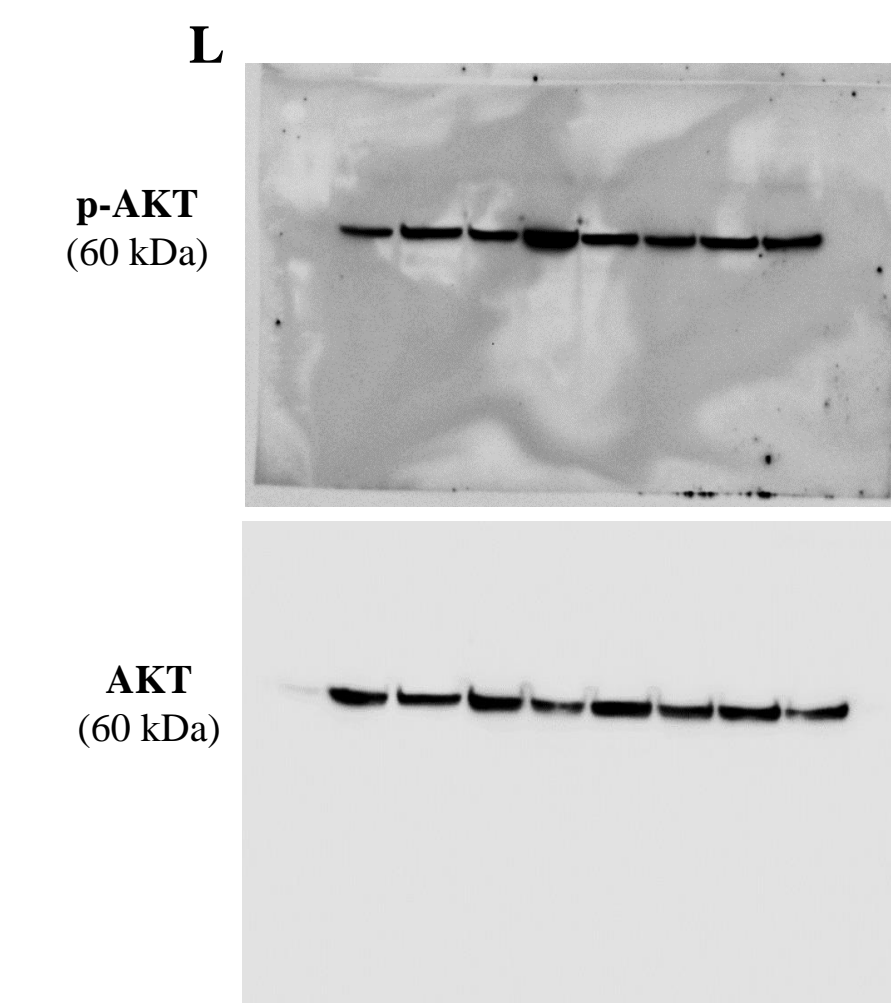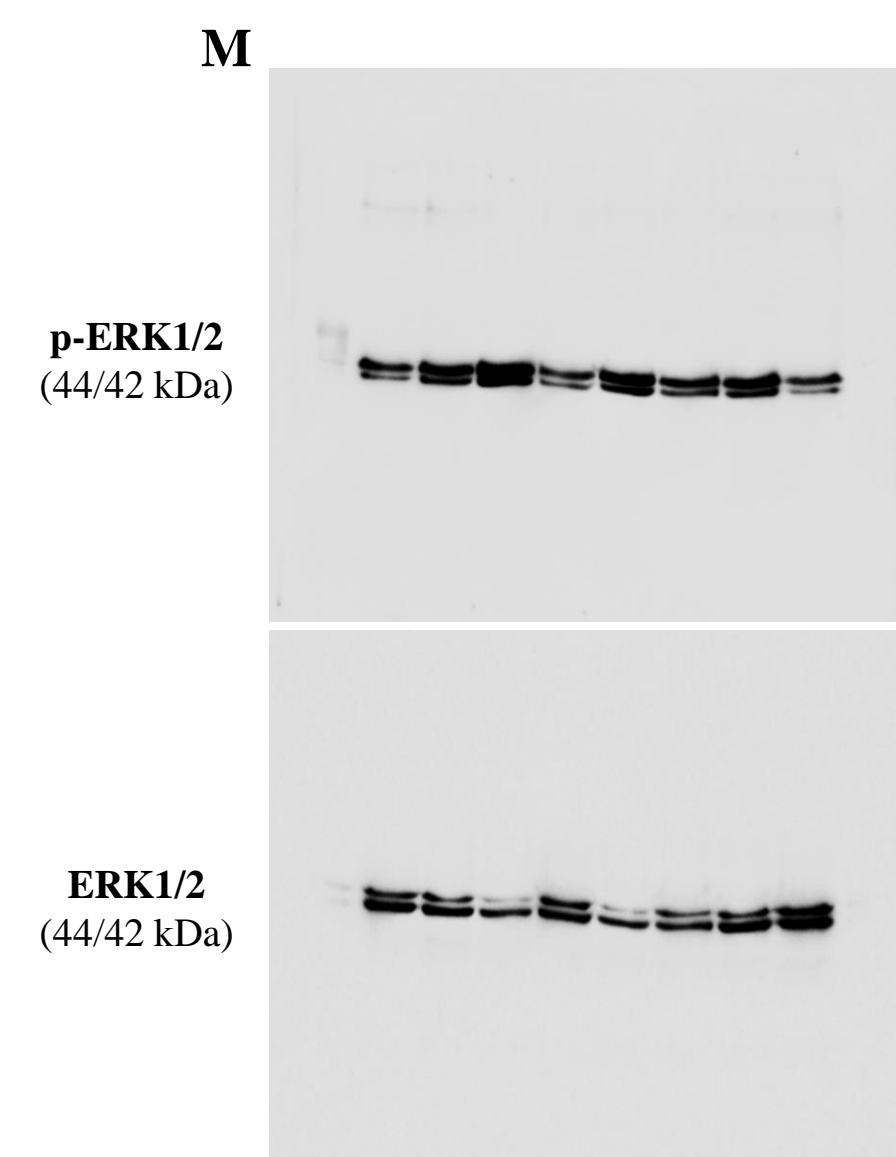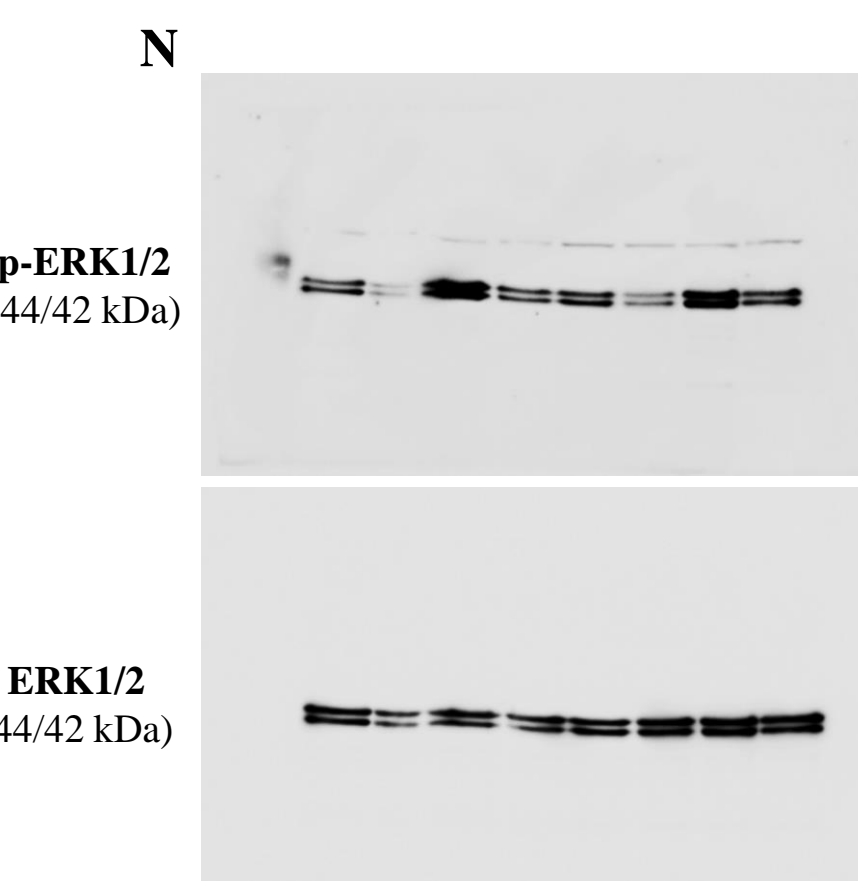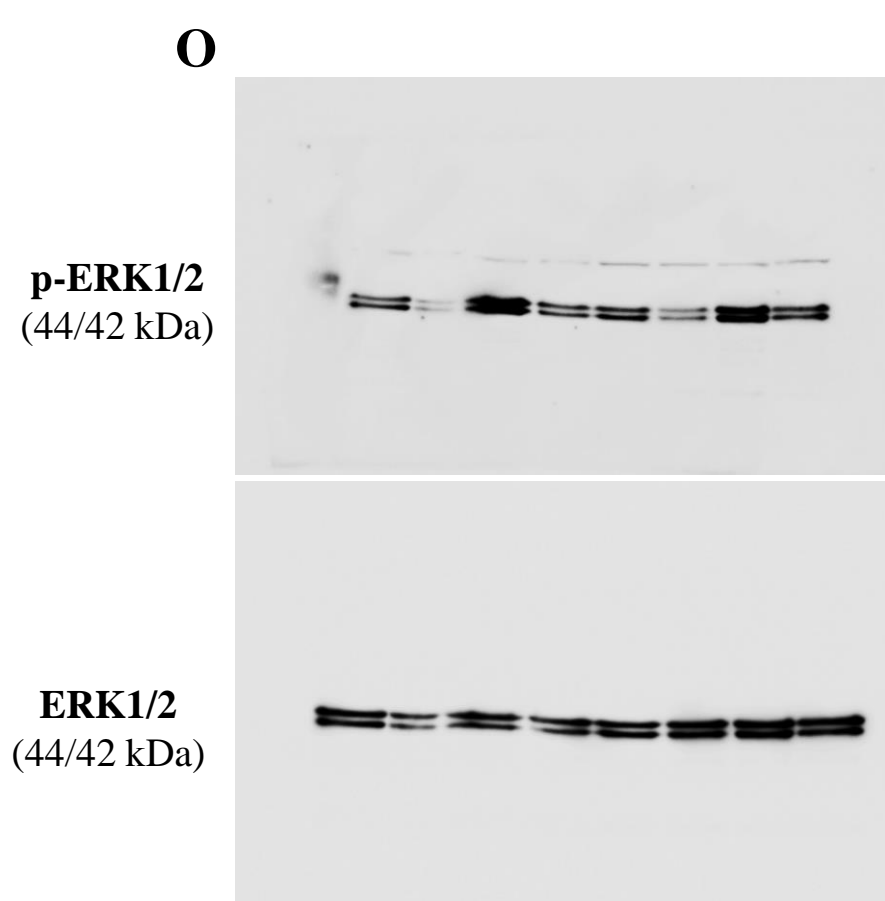

Supplement: s1 [file s1]
